# Supplementary material
Source: MDPI journal article supplement (https://www.mdpi.com/2073-4441/15/20/3703)
Supplement: s1 [file s1]

**Greener synthesis of surface modified nanosized biochar for enhanced simultaneous removal of steroidal hormone and heavy metals from wastewater: Optimization by central composite design.**

Sefiu Olaitan Amusat<sup>1</sup> (0000-0003-3772-6481), Temesgen Girma Kebede<sup>1</sup> (0000-0001-7083-1772), Edward Ndumiso Nxumalo<sup>2</sup> (0000-0001-8225-2401), Simiso Dube<sup>1</sup> (0000-0003-1225-5812), and Mathew Muzi Nindi<sup>2\*</sup> (0000-0001-7222-1505)

<sup>1</sup>Department of Chemistry, College of Science, Engineering and Technology, University of South Africa, The Science Campus, Florida Park, Corner Christian de Wet & Pioneer Avenue, Florida, 1709, South Africa

<sup>2</sup>Institute for Nanotechnology and Water Sustainability (iNanoWS), College of Science, Engineering and Technology, The Science Campus, University of South Africa, Corner Christian de Wet & Pioneer Avenue Florida Park, 1709, South Africa

*\*Corresponding author: [49055313@mylife.unisa.ac.za](mailto:49055313@mylife.unisa.ac.za) and [nindimm@unisa.ac.za](mailto:nindimm@unisa.ac.za)*

Supplementary material

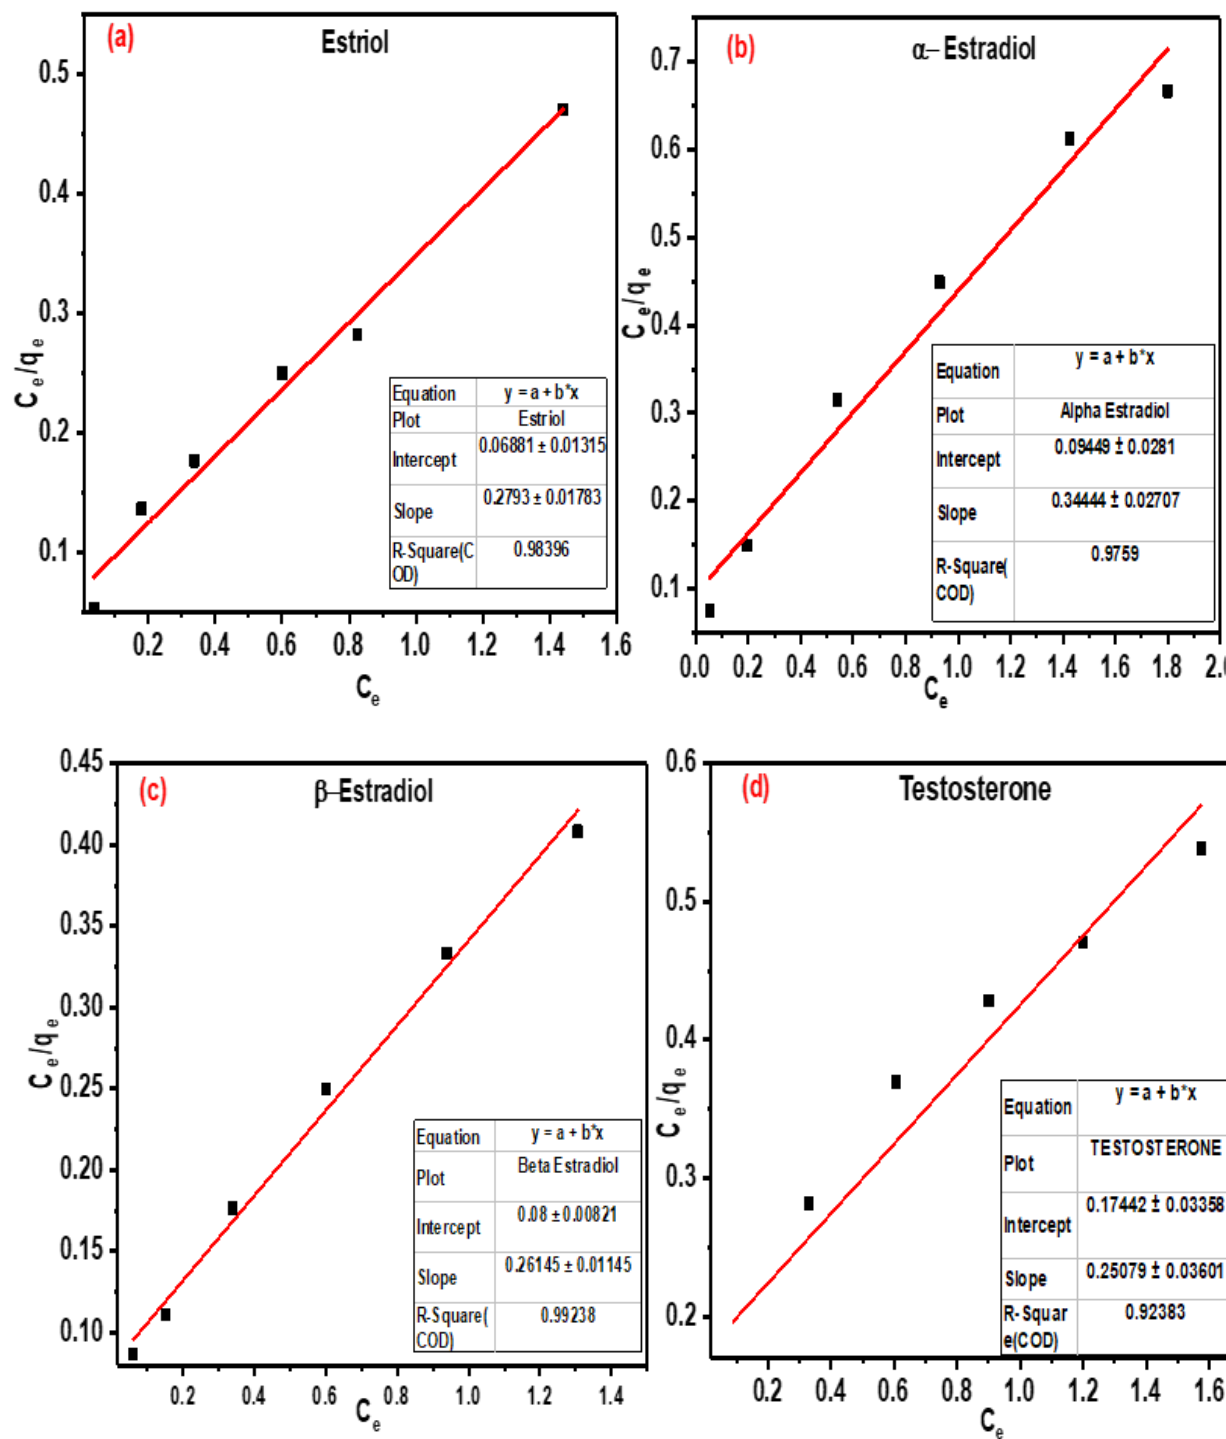

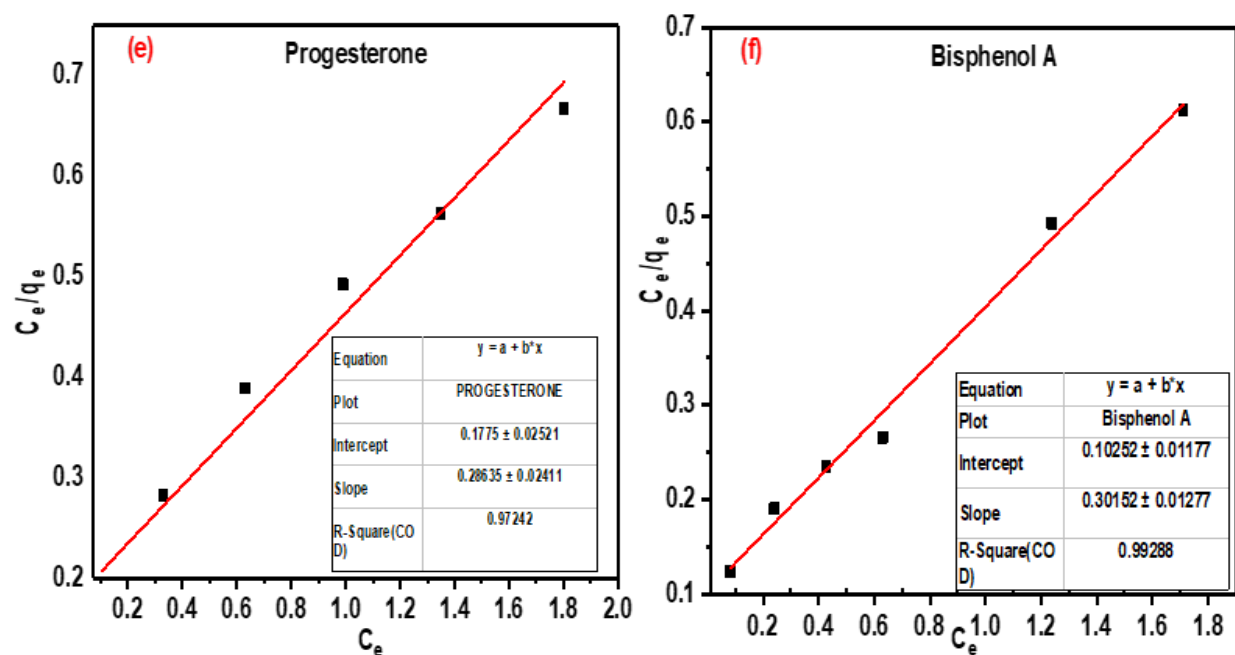

Langmuir Isotherm model of the adsorption of (a) Estriol, (b)  $\alpha$ -Estradiol, (c)  $\beta$ -Estradiol, (d) Testosterone, (e) Progesterone (f) Bisphenol A hormones by ball milled biochar.

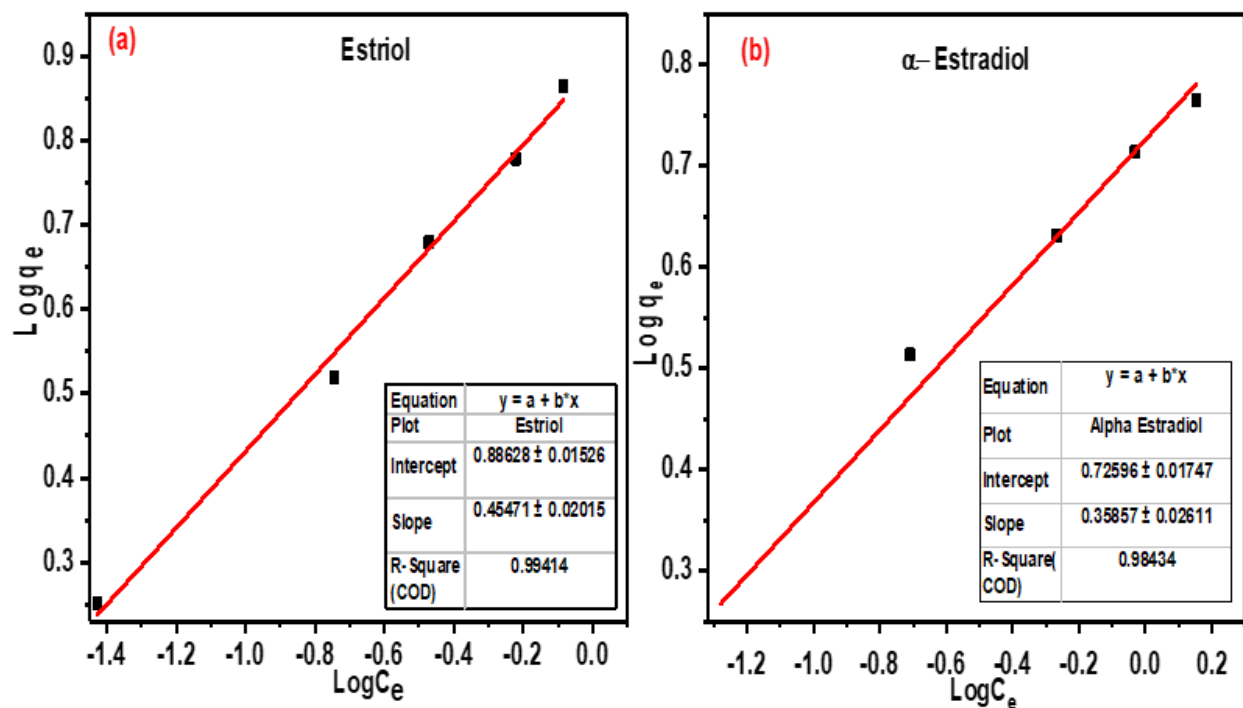

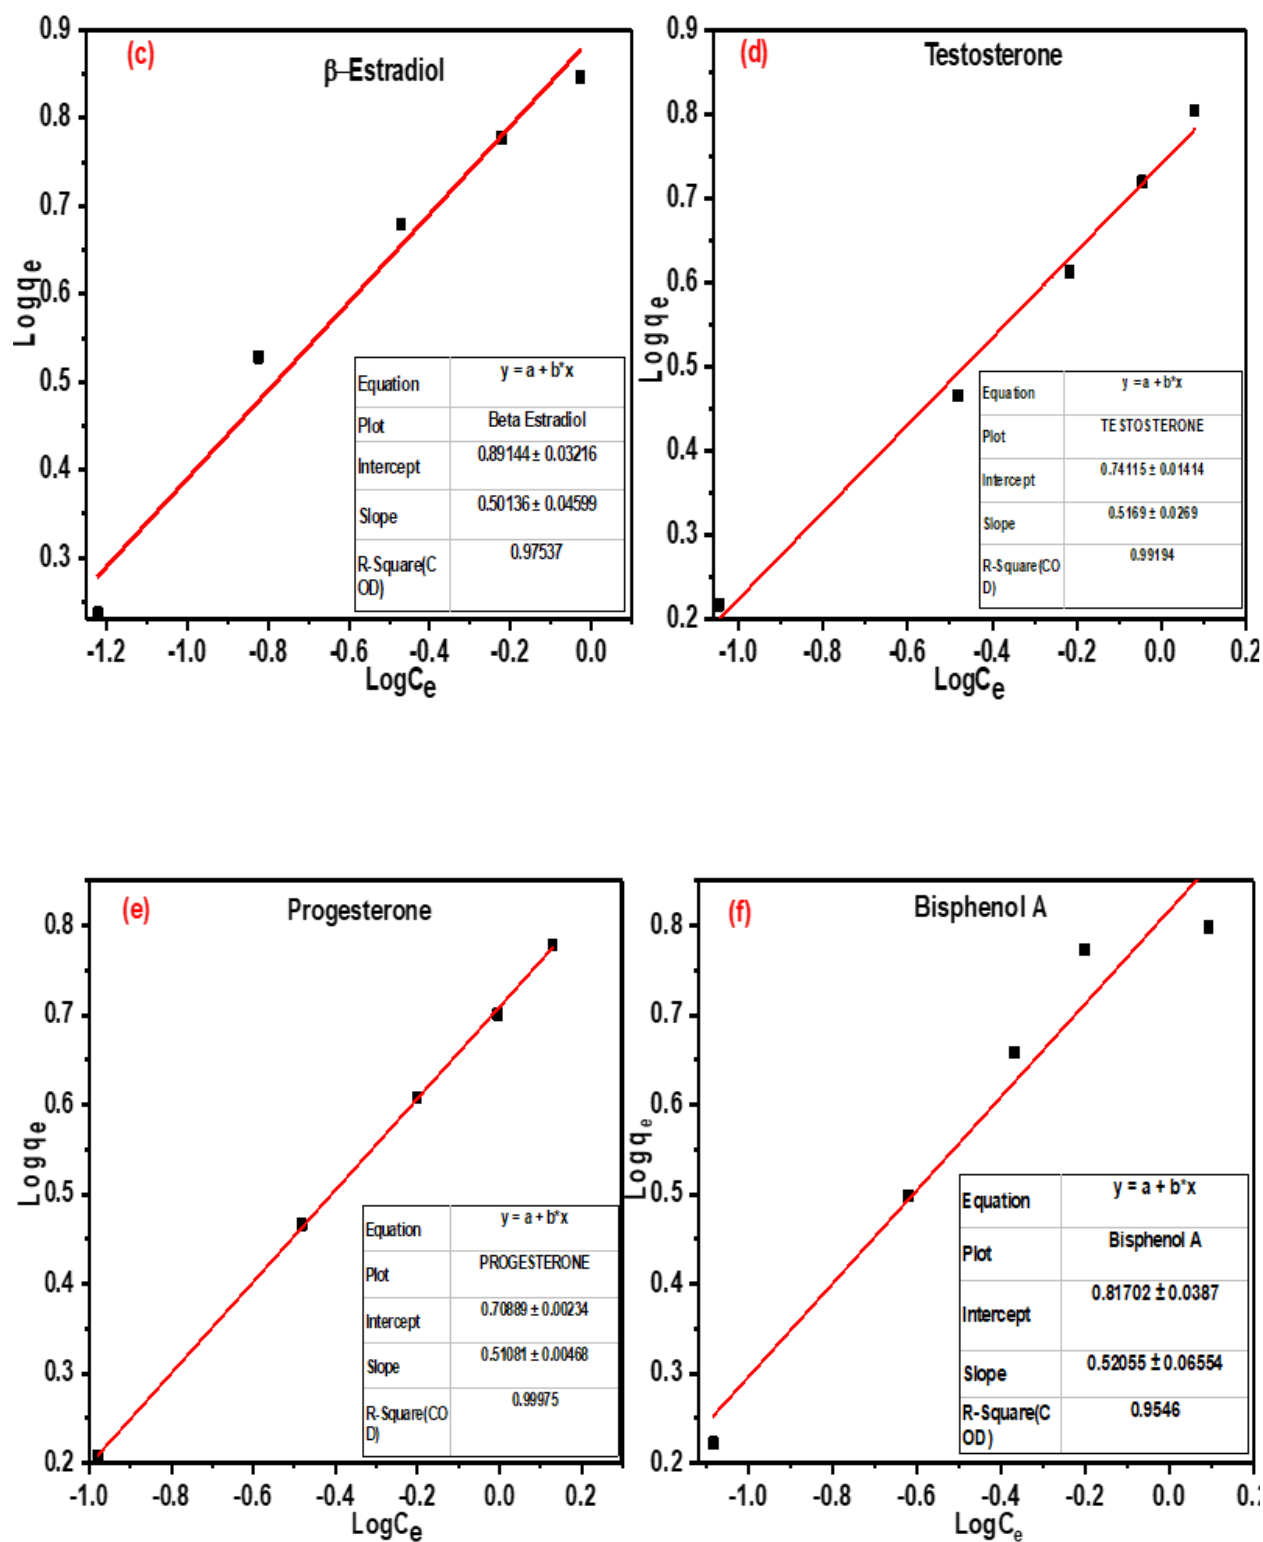

Freundlich Isotherm model of the adsorption of (a) Estriol, (b)  $\alpha$ -Estradiol, (C)  $\beta$ -Estradiol, (d) Testosterone, (e) Progesterone (f) Bisphenol A hormones by ball milled biochar.
